# Supplementary material for: A CRISPR-Cas9 knockout screening identifies IRF2 as a key driver of OAS3/RNase L-mediated RNA decay during viral infection
Source: PubMed Central journal article supplement — Proc Natl Acad Sci U S A. 2024 Oct 30;121(45):e2412725121. doi: 10.1073/pnas.2412725121 (PMC11551408; doi:10.1073/pnas.2412725121), 2024-10-30
Supplement: pnas.2412725121.sapp.pdf [file pnas.2412725121.sapp.pdf]

## Supporting Information for

### A CRISPR-Cas9 Knockout Screening Identifies IRF2 as a Key Driver of OAS3/RNase L-Mediated RNA Decay During Viral Infection

Sunwoo Oh, Gisselle Santiago, Lavanya Manjunath, Junyi Li, Alexis Bouin, Bert L. Semler and Rémi Buisson

Rémi Buisson  
Email: rbuisson@uci.edu

#### **This PDF file includes:**

Figures S1 to S5  
Tables S1 to S5  
Legend for Dataset S1

#### **Other supporting materials for this manuscript include the following:**

Dataset S1

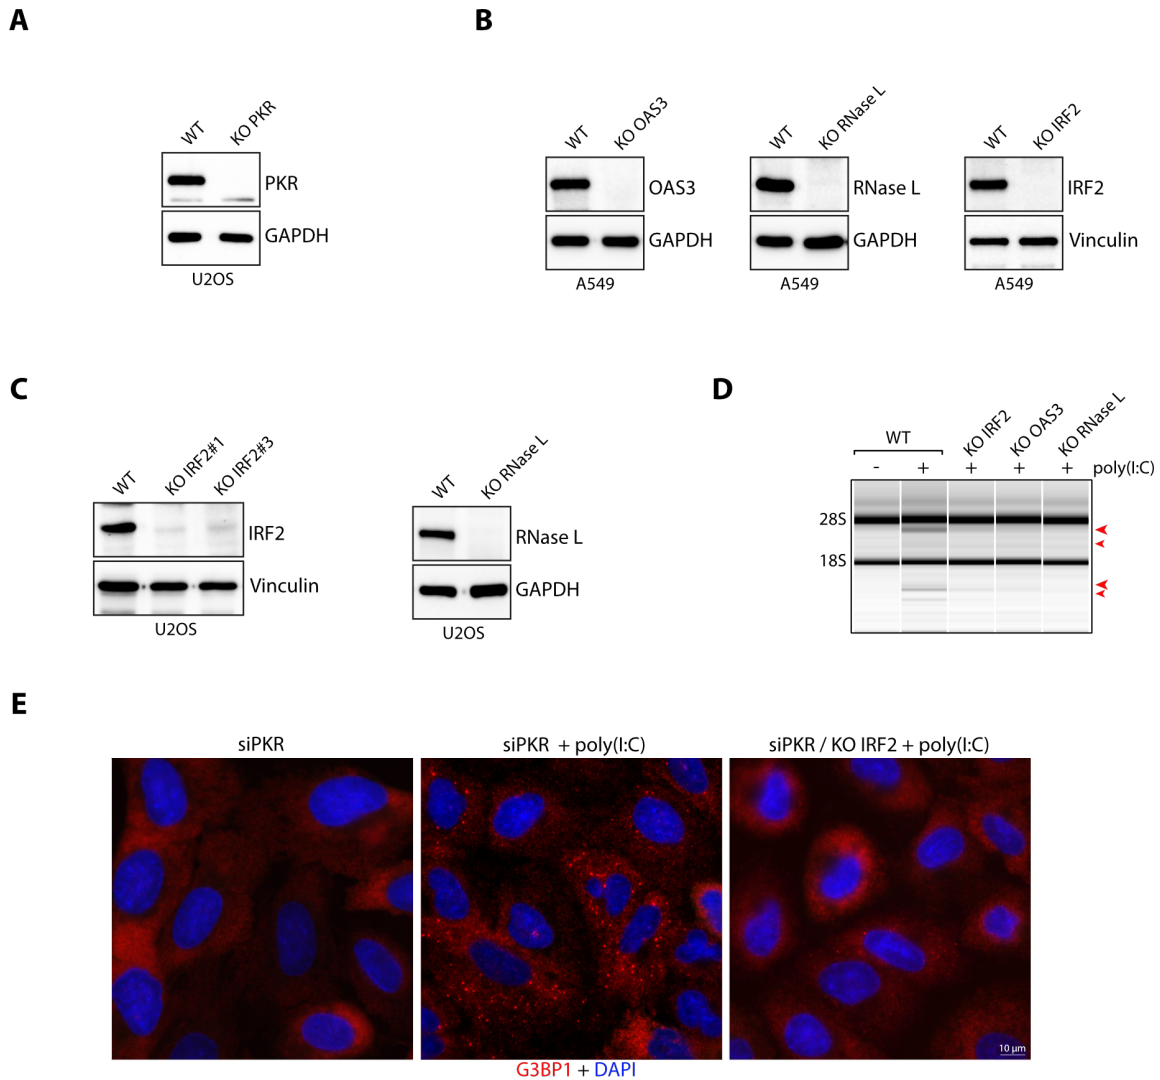

**Fig. S1. A.** The level of PKR and GAPDH was analyzed in U2OS WT and PKR KO cells by western blot. **B.** U2OS cells KO for OAS3, IRF2, or RNase L were analyzed by western blot using the indicated antibodies. **C.** U2OS cells KO for IRF2 or RNase L were analyzed by western blot using the indicated antibodies. **D.** Indicated U2OS cells were transfected with poly(I:C) (40ng/mL) for 4 hours and then analyzed for RNA integrity by bioanalyzer. The red arrows indicated ribosomal RNA cleavage products. **E.** Wider representative immunofluorescence for G3BP1 in A549 cells knocked down with PKR siRNA and transfected with poly(I:C) (25 ng/mL, 4h), as shown in Figure 1F.

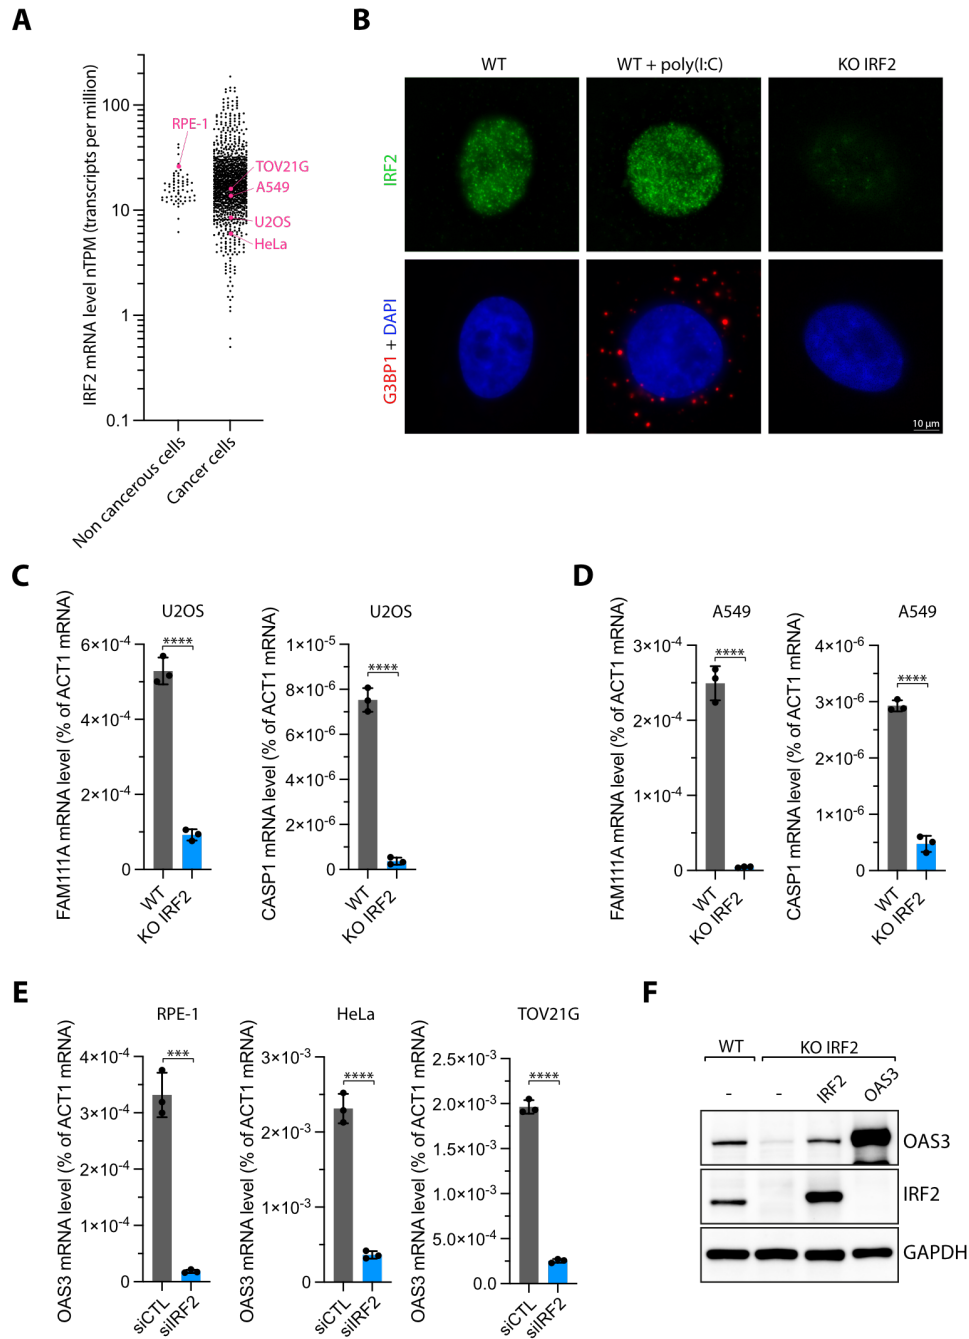

**Fig. S2. A.** IRF2 mRNA expression levels (nTPM; Transcripts per million) were obtained from The Human Protein Atlas and analyzed for non-cancerous and cancer cells. Cell lines validated in this study are highlighted in pink. **B.** Representative immunofluorescence for IRF2, G3BP1, and DAPI in A549 WT and A549 IRF2 KO cells. When indicated, cells were transfected with poly(I:C) (25 ng/mL) for 4h. **C-D.** The FAM111A and CASP1 mRNA levels were monitored by RT-qPCR in U2OS (C) or A549 (D) cell lines. Mean values  $\pm$  SD ( $n = 3$ ). \*\*\*\* $P < 0.0001$  (two-tailed t-test) **E.** RPE-1, HeLa, and TOV21G cells were transfected with siCTL or siIRF2 for 72 hours, and the OAS3 mRNA levels were monitored by RT-qPCR. Mean values  $\pm$  SD ( $n = 3$ ). \*\*\*\* $P < 0.0001$  (two-tailed t-test) **F.** A549 WT or IRF2 KO cells were complemented with wild-type IRF2 or OAS3. The protein levels of OAS3, IRF2, and GAPDH were analyzed by western blot.

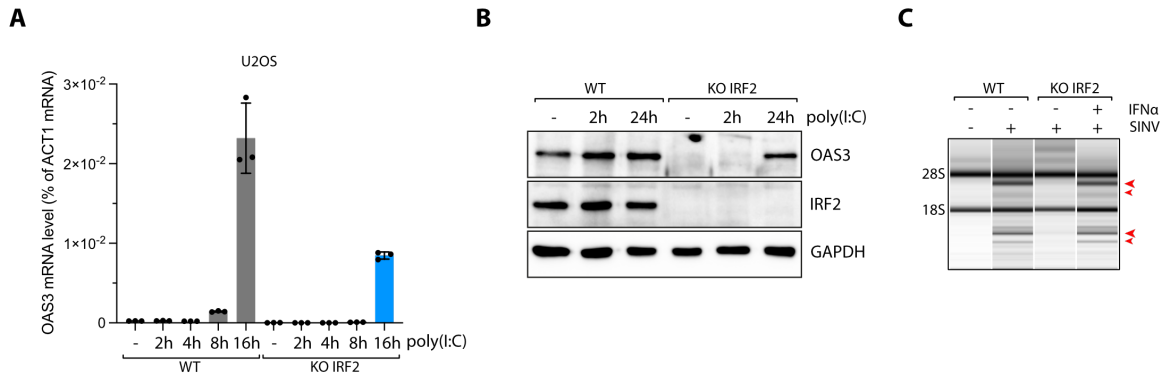

**Fig. S3. A.** U2OS WT and IRF2 KO cells were transfected with poly(I:C) (100 ng/mL). The level of OAS3 mRNA was monitored at indicated time points by RT-qPCR. Mean values  $\pm$  SD. **B.** U2OS WT and IRF2 KO cells were transfected with poly(I:C) (100 ng/mL). The protein levels of OAS3, IRF2, and GAPDH were monitored at indicated time points by western blot. **C.** U2OS WT and IRF2 KO cells were pre-treated with IFN $\alpha$  (1000 U/mL) for 8 hours and infected with SINV (MOI=1) for 24 h. The RNAs were extracted and analyzed using bioanalyzer for RNA integrity. The red arrows indicate RNA cleavage products.

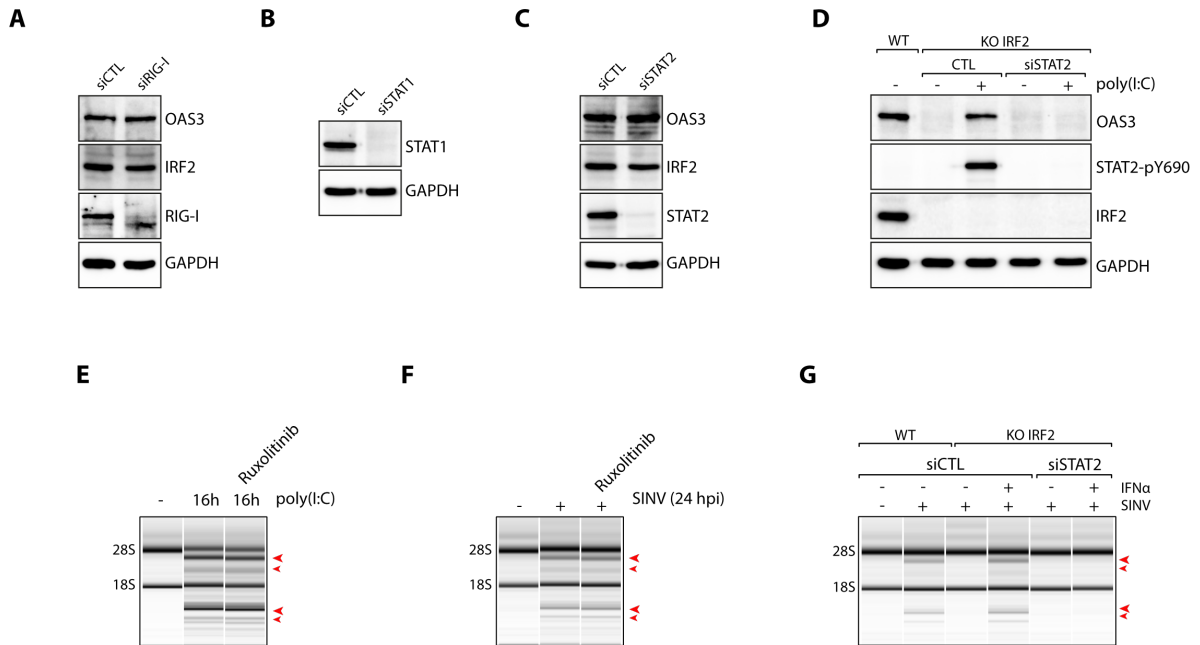

**Fig. S4. A-C.** A549 cells were knocked down for RIG-I (**A**), STAT1 (**B**), or STAT2 (**C**), and indicated protein levels were analyzed by western blot. **D.** U2OS IRF2 KO cells knocked down with either siCTL or siSTAT2 were transfected with poly(I:C) (100ng/mL) for 24h. The protein levels of OAS3, STAT2-pY690, IRF2, and GAPDH were analyzed by western blot. **E.** A549 WT cells transfected with poly(I:C) (10 ng/mL) for 16 hours were treated with Ruxolitinib (2  $\mu$ M) and analyzed for RNA integrity using Bioanalyzer. The red arrows indicated ribosomal RNA cleavage products. **F.** U2OS WT cells infected with SINV (MOI=1) for 24h were treated with Ruxolitinib (2  $\mu$ M). Total RNA was analyzed for integrity by bioanalyzer. The red arrows indicated ribosomal RNA cleavage products. **G.** U2OS WT or IRF2 KO cells transfected with either siCTL or siSTAT2 for 40 h. Cells were then treated with IFN $\alpha$  (1000 U/mL) for 8 hours and infected with SINV (MOI=1, 16 hpi). Total RNAs were isolated and analyzed for RNA integrity by bioanalyzer.

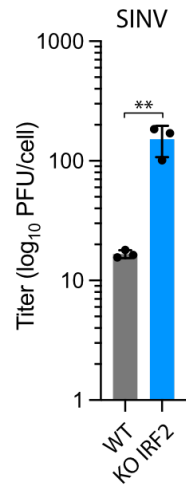

**Fig. S5.** A549 WT or IRF2 KO cells were infected with SINV (MOI =10, 24 hpi), and the titer (log<sub>10</sub> PFU/cell) of infectious virus from the supernatant was quantified by plaque assay in Vero cells from three biological replicates. Mean values ± SD. \*\*P < 0.01.

**Table S1.** CRISPR-Translate screening library primers

| <b>P5 Primers</b> | <b>Sequence</b>                                                                                     |
|-------------------|-----------------------------------------------------------------------------------------------------|
| P5_0n             | AATGATACGGCGACCACCGAGATCTACACTCTTTCCCTACACGACGCTCTTCCGATCTTTGTGAAAGGACGAAACACCG                     |
| P5_1n             | AATGATACGGCGACCACCGAGATCTACACTCTTTCCCTACACGACGCTCTTCCGATCTTTGTGAAAGGACGAAACACCG                     |
| P5_2n             | AATGATACGGCGACCACCGAGATCTACACTCTTTCCCTACACGACGCTCTTCCGATCTGCTTGTGAAAGGACGAAACACCG                   |
| P5_3n             | AATGATACGGCGACCACCGAGATCTACACTCTTTCCCTACACGACGCTCTTCCGATCTAGCTTGTGAAAGGACGAAACACCG                  |
|                   |                                                                                                     |
| <b>P7 Primers</b> | <b>Sequence (The unique barcode sequences are indicated in red)</b>                                 |
| P7_A1             | CAAGCAGAAGACGGCATAACGAGAT <b>CGGTTCAA</b> GTGACTGGAGTTCAGACGTGTGCTCTTCCGATCTCCAATCCCCTCCTTTCAAGACCT |
| P7_A2             | CAAGCAGAAGACGGCATAACGAGAT <b>GCTGGATT</b> GTGACTGGAGTTCAGACGTGTGCTCTTCCGATCTCCAATCCCCTCCTTTCAAGACCT |
| P7_A3             | CAAGCAGAAGACGGCATAACGAGAT <b>TAAGTCGG</b> GTGACTGGAGTTCAGACGTGTGCTCTTCCGATCTCCAATCCCCTCCTTTCAAGACCT |
| P7_A4             | CAAGCAGAAGACGGCATAACGAGAT <b>TAAAGTT</b> GTGACTGGAGTTCAGACGTGTGCTCTTCCGATCTCCAATCCCCTCCTTTCAAGACCT  |
| P7_A5             | CAAGCAGAAGACGGCATAACGAGAT <b>TAAGTCAG</b> GTGACTGGAGTTCAGACGTGTGCTCTTCCGATCTCCAATCCCCTCCTTTCAAGACCT |
| P7_A6             | CAAGCAGAAGACGGCATAACGAGAT <b>GCTGAGAA</b> GTGACTGGAGTTCAGACGTGTGCTCTTCCGATCTCCAATCCCCTCCTTTCAAGACCT |

**Table S2.** siRNA sequences (Thermo Fisher Scientific)

| <b>siRNA</b> | <b>Catalog</b> | <b>Sequence</b>              |
|--------------|----------------|------------------------------|
| siCTL        | 4390843        | Not disclosed by the company |
| siRIG-I      | s223614        | CAAGAAGAGUACCACUUAAtt        |
| siSTAT1      | s279           | GGUUCACUAUAGUUGCGGAtt        |
| siSTAT1      | s278           | CGGUUGAACCCUACACGAAtt        |
| siSTAT2      | s13528         | GGCUCAUUGUGGUCUCUAAAtt       |
| siSTAT2      | s13530         | GGCCGAUUAACUACCCUAAAtt       |
| siIRF2       | s7504          | GAGGAAUUAUGAAGGCAAAtt        |
| siIRF2       | s7506          | AGAACGGCCUUCUAGAAAtt         |

**Table S3.** Antibodies

| <b>Targets</b> | <b>Antibody Species</b> | <b>Company (Cat# number)</b> | <b>Antibody Dilution</b> |
|----------------|-------------------------|------------------------------|--------------------------|
| GAPDH          | Rabbit polyclonal       | EMD Millipore (#ABS16)       | 1/20,000 WB              |
| RIG-I          | Rabbit monoclonal       | Cell signaling (#3743)       | 1/1000 WB                |
| STAT1          | Mouse monoclonal        | Santa Cruz (#sc-464)         | 1/1000 WB                |
| STAT2          | Rabbit monoclonal       | Cell Signaling (#72604)      | 1/1500 WB or 1/100 ChIP  |
| STAT1-pY701    | Rabbit monoclonal       | Cell Signaling (#9167)       | 1/100 WB                 |
| STAT2-pY690    | Rabbit monoclonal       | Cell Signaling (#88410)      | 1/1500 WB                |
| G3BP1          | Rabbit monoclonal       | BD Biosciences (#611127)     | 1/500 IF                 |
| PKR            | Mouse monoclonal        | BD Biosciences (#610764)     | 1/1000 WB                |
| PKR-pT446      | Rabbit monoclonal       | Abcam (ab32036)              | 1/1000 WB                |
| Puromycin      | Mouse monoclonal        | EMD Millipore (#MABE343)     | 1/500 IF                 |
| Vinculin       | Mouse monoclonal        | Sigma (V9264)                | 1/5000 WB                |
| IRF2           | Rabbit monoclonal       | Cell Signaling (#59452)      | 1/1000 WB or 1/100 ChIP  |
| OAS3           | Rabbit monoclonal       | Cell Signaling (#74906)      | 1/1000 WB                |
| RNase L        | Mouse monoclonal        | Santa Cruz (sc-74405)        | 1/1000 WB                |

**Table S4.** gRNA sequences

| Gene    | Sequence (used for generating KOs with purified Cas9) |
|---------|-------------------------------------------------------|
| PKR     | AATACATACCGTCAGAAGCA                                  |
| RNase L | GCAATCGCTGCGAGGATAAA                                  |
|         |                                                       |
| Gene    | Sequence (used for generating KOs with PX458 system)  |
| IRF2    | CAGCATTCCGGTAGACCCTGA                                 |
| OAS3    | GACGGTCAACTATAGCACTG                                  |
| RNase L | AGCTGTGAAGACGTTCTGTG                                  |
| SLC38A6 | TCACCTAAATCCAAAGACAC                                  |
| ADSL    | GGTATAAATTCCGGACATGG                                  |
| NOP14   | CTCTAACAGGATGAAGACGG                                  |

**Table S5.** qPCR primers

| Target names        | FORWARD                 | REVERSE                 |
|---------------------|-------------------------|-------------------------|
| Actin               | CCAACCGCGAGAAGATGA      | CCAGAGGCGTACAGGGATAG    |
| OAS3                | CCGAACTGTCCTGGGCCTGATCC | CCCATTCCCCAGGTCCCATGTGG |
| IFN- $\beta$        | ACACTGGTCGTGTTGTTGAC    | GGAAAGAGCTGTCGTGGAGA    |
| ISG15               | CGCAGATCACCCAGAAGATCG   | TTCGTGCGATTTGTCCACCA    |
| IFIT2               | TGGTGGCAGAAGAGGAAGAT    | GTAGGCTGCTCTCCAAGGAA    |
| DDX60               | AAGGTGTTCTTGATGATCTCC   | TGACAATGGGAGTTGATATTCC  |
| CASP1               | CTGGGGACTCTCAGCAGATCA   | ATAGCTGGGTTGTCCTGCAC    |
| FAM111A             | CTTCACAAAAAGGGCGCAA     | ATCAACTGGCTGGGTGCTTT    |
| OAS3<br>(ChIP-qPCR) | CAGGAAGTGGGTGTCAGGTC    | CGGCCTTCGGATTTCTGGT     |

**Dataset S1 (separate file).** Ranking of all the genes detected with CRISPR-Translate from Figure 1B. RNase L, OAS3, and IRF2 were highlighted in red.
